# Supplementary material for: Identification and validation of senescence-related genes in polycystic ovary syndrome
Source: J Ovarian Res. 2024 Jan 6;17:7. doi: 10.1186/s13048-023-01338-4 (PMC10770899; doi:10.1186/s13048-023-01338-4)
Supplement: Supplementary file 2 — Additional file 2: Table S2. List of aging and senescence-associated genes. [file 13048_2023_1338_MOESM2_ESM.xlsx]

## Sheet: ASIGs
AAK1
ABI3
ACLY
ADCK5
AGT
AKR1B1
AKT1
ALOX15B
AR
ARPC1B
ASF1A
ASPH
ATF7IP
ATM
AURKA
AXL
BAG3
BCL6
BHLHE40
BLK
BLVRA
BMI1
BRAF
BRCA1
BRD7
BTG3
CAV1
CAVIN1
CBX7
CBX8
CCND1
CDK1
CDK18
CDK2AP1
CDK4
CDK6
CDKN1A
CDKN1B
CDKN1C
CDKN2A
CDKN2AIP
CDKN2B
CEBPB
CENPA
CHEK1
CKB
CPEB1
CSNK1A1
CSNK2A1
CTNNAL1
CXCL1
CXCL8
CYR61
DDB2
DEK
DGCR8
DHCR24
DHX9
DLX2
DPY30
DUSP16
DUSP3
E2F1
EHF
ENDOG
EPHA3
ERRFI1
ETS1
ETS2
EWSR1
EZH2
FASTK
FBXO31
FOS
FOXM1
FOXO3
FXR1
G6PD
GAPDH
GATA4
GKN1
GLB1
GNG11
GRK6
HDAC1
HDAC4
HEPACAM
HIVEP1
HJURP
HK3
HMGB1
HRAS
HSPA5
HSPB2
ID1
ID4
IFNG
IGFBP1
IGFBP3
IGFBP5
IGFBP6
IL1A
ING1
ING2
IRF3
IRF5
IRF7
ITGB4
ITPK1
ITPKB
ITSN2
KCNJ12
KDM4A
KDM5B
KIAA1524
KL
KSR2
LATS1
LEO1
LGALS3
LIMA1
LIMK1
MAD2L1
MAGEA2
MAGOH
MAGOHB
MAP2K1
MAP2K2
MAP2K3
MAP2K6
MAP2K7
MAP3K6
MAP3K7
MAP4K1
MAPK12
MAPK14
MAPKAPK5
44260
MAST1
MATK
MCL1
MCRS1
MDH1
MECP2
MMP9
MOB3A
MORC3
MORF4
MVK
MXD4
MYC
MYLK
NADK
NANOG
NDRG1
NEK1
NEK4
NEK6
NFE2L2
NINJ1
NOTCH3
NOX4
NR2E1
NTN4
NUAK1
OTX2
P3H1
PAK4
PATZ1
PBRM1
PCGF2
PDCD10
PDIK1L
PDPK1
PDZD2
PEBP1
PEX19
PIAS4
PIK3C2A
PIK3R5
PIM1
PKM
PLA2R1
PML
PMVK
PNPT1
POT1
POU5F1
PPM1B
PPM1D
PRKCD
PRKCH
PRMT6
PROX1
PRPF19
PSMB5
PSMD14
PTTG1
RAD21
RAF1
RB1
RBP2
RBX1
RNASEL
RPS6KA6
RSL1D1
RUNX1
RUVBL2
SELENOH
SENP1
SENP2
SENP7
SERPINE1
SFN
SGK1
SIK1
SIN3B
SIRT1
SIRT6
SIX1
SLC13A3
SLC16A7
SMARCA4
SMARCB1
SMG1
SMURF2
SNAI1
SOCS1
SOD1
SORBS2
SOX2
SOX5
SP1
SPIN1
SPOP
SRC
SREBF1
SRSF1
STAT5B
STK32C
STK40
SUPT5H
SYK
TACC3
TBX2
TERC
TERF2
TERT
TFAP4
TFDP1
TGFB1I1
TLR3
TMSB4X
TNFSF13
TNFSF15
TOP1
TP53
TP63
TPR
TRIM28
TRPM8
TXN
TXNIP
TYK2
UBTD1
USP1
VEGFA
VENTX
WNT16
WNT2
WRN
WT1
WWP1
XAF1
YAP1
YPEL3
ZFP36
ZMAT3
ZNF148
A2M
ABL1
ADCY5
AGPAT2
AGTR1
AIFM1
APEX1
APOC3
APOE
APP
APTX
ARHGAP1
ARNTL
ATF2
ATP5O
ATR
BAK1
BAX
BCL2
BDNF
BLM
BRCA2
BSCL2
BUB1B
BUB3
C1QA
CACNA1A
CAT
CCNA2
CDC42
CDK7
CEBPA
CETP
CHEK2
CISD2
CLOCK
CLU
CNR1
COQ7
CREB1
CREBBP
CSNK1E
CTF1
CTGF
CTNNB1
DBN1
DDIT3
DGAT1
DLL3
EEF1A1
EEF1E1
EEF2
EFEMP1
EGF
EGFR
EGR1
EIF5A2
ELN
EMD
EP300
EPOR
EPS8
ERBB2
ERCC1
ERCC2
ERCC3
ERCC4
ERCC5
ERCC6
ERCC8
ESR1
FAS
FEN1
FGF21
FGF23
FGFR1
FLT1
FOXO1
FOXO4
GCLC
GCLM
GDF11
GH1
GHR
GHRH
GHRHR
GPX1
GPX4
GRB2
GRN
GSK3A
GSK3B
GSR
GSS
GSTA4
GSTP1
GTF2H2
H2AFX
HBP1
HDAC2
HDAC3
HELLS
HESX1
HIC1
HIF1A
HMGB2
HOXB7
HOXC4
HSF1
HSP90AA1
HSPA1A
HSPA1B
HSPA8
HSPA9
HSPD1
HTRA2
HTT
IFNB1
IGF1
IGF1R
IGF2
IGFBP2
IKBKB
IL2
IL2RG
IL6
IL7
IL7R
INS
INSR
IRS1
IRS2
JAK2
JUN
JUND
KCNA3
LEP
LEPR
LMNA
LMNB1
LRP2
MAP3K5
MAPK3
MAPK8
MAPK9
MAPT
MAX
MDM2
MED1
MIF
MLH1
MSRA
MT-CO1
MT1E
MTOR
MXD1
MXI1
NBN
NCOR1
NCOR2
NFE2L1
NFKB1
NFKB2
NFKBIA
NGF
NGFR
NOG
NR3C1
NRG1
NUDT1
PAPPA
PARP1
PCK1
PCMT1
PCNA
PDGFB
PDGFRA
PDGFRB
PEX5
PIK3CA
PIK3CB
PIK3R1
PIN1
PLAU
PLCG2
PMCH
POLA1
POLB
POLD1
POLG
PON1
POU1F1
PPARA
PPARG
PPARGC1A
PPP1CA
PRDX1
PRKCA
PRKDC
PROP1
PSEN1
PTEN
PTGS2
PTK2
PTK2B
PTPN1
PTPN11
PYCR1
RAD51
RAD52
RAE1
RECQL4
RELA
RET
RGN
RICTOR
RPA1
S100B
SDHC
SHC1
SIN3A
SIRT3
SIRT7
SLC13A1
SNCG
SOCS2
SOD2
SPRTN
SQSTM1
SST
SSTR3
STAT3
STAT5A
STK11
STUB1
SUMO1
SUN1
TAF1
TBP
TCF3
TERF1
TFAP2A
TGFB1
TNF
TOP2A
TOP2B
TOP3B
TP53BP1
TP73
TPP2
TRAP1
TRPV1
UBB
UBE2I
UCHL1
UCP1
UCP2
UCP3
VCP
XPA
XRCC5
XRCC6
YWHAZ
ZMPSTE24
TMEM159
CHPF2
SLC9A7
PLOD1
FAM234B
DHRS7
SRPX
SRPX2
TNFSF13B
PDLIM1
ELMOD1
CCND3
TMEM30A
STAT1
RND3
TMEM59
SARAF
SLCO2B1
ARRDC4
PAM
WDR78
WDR63
NCSTN
SLC16A14
GPR155
CLDN1
JCAD
BLCAP
FILIP1L
TAP1
TNFRSF10C
SAMD9L
SMCO3
POFUT2
KIAA1671
LRP10
DIO2
MAP4K3-DT
LINC02154
TM4SF1-AS1
PTCHD4
H2AJ
PURPL
AL512306.2
AL133243.3
SNRPA
AL136295.5
ITGB1BP2
OR7E122P
C14orf93
TMCO6
RTEL1
SRSF2
AC115284.2
NKIRAS1
AC114490.1
PLA2G4C
AC074387.1
KANTR
ARL6IP4
C2orf42
AC068946.1
BTN1A1
DDX58
JMJD7
LINC02158
PCIF1
ZNFX1
SRSF7
STX3
MAP1LC3B
CIDECP1
DLEU2L
CDHR4
SNHG3
TRIM52-AS1
ALG6
H2AC20
AL390719.1
OVGP1
BLOC1S3
HMGN2
BRAP
TRA2B
ATG4A
TPRG1L
CZIB
AL049840.5
RBM10
AC022211.3
TAC3
TPCN2
TAF6
NRF1
ZNF2
MAMDC4
HAUS4
CCDC174
SLC23A3
ZNF628
THAP7
TMEM217
AC147067.1
SLC25A45
ANP32B
H4C8
AL162581.1
UFM1
HNRNPA1
CATSPERG
SRSF4
TRAPPC12
RBM14
GPN3
ZDHHC12
FOXD4L1
EEFSEC
RFPL4A
SFPQ
DHPS
UGT2B15
R3HCC1L
AL441992.2
NRM
ZNF674
NT5C
THOC6
AC139530.1
UBE4B
TRIM35
CRYZL1
IFIT2
WDYHV1
RNF103
RUNDC1
RPL7A
ZBTB12
TECR
AC022413.2
ADGRF2
ZNF490
PPP2R5B
CCDC34
RNF111
HNRNPM
WDR34
ALOX15P1
C18orf32
RASSF3
PITPNA-AS1
ZFYVE1
NDUFC1
THAP6
UQCRC1
ISG15
NEURL3
IFIT1
STK38L
AFF4
HNRNPR
SOS1
ZNF564
MAGEB6
MRPS31P4
SPIDR
HAUS5
AL592148.3
ANAPC15
ITGAM
TRNAU1AP
NDUFA12
GFY
MRPS24
AC073283.2
IPCEF1
CCDC59
FAM214B
P4HA2
DYNLT3
SCOC
TAF13
TOLLIP
GBE1
CHMP5
DGKA
PLXNA3
DDA1
TMEM87B
ZBTB7A
RAI14
TSPAN13
ZNHIT1
ACADVL
SLC10A3
B4GALT7
BCL2L2
NOL3
KLC1
PLK3
SLC16A3
ADPGK
PIK3CG
SOD3
ADIPOR2
ANXA3
ANXA5
APOD
B2M
C1QB
C1QC
C3
C4A
CLIC4
CTSS
DCLK1
DERL1
EFCAB14
FCGR2A
FCGR2B
GBP2
GFAP
GNS
GPNMB
GSTA1
H1-2
HBA1
HCST
HLA-G
IL33
JCHAIN
LAPTM5
LITAF
LYZ
MGST1
MPEG1
MSN
MT1F
NPC2
PCSK6
PSMD11
PTGES3
RASA3
RNF213
S100A4
S100A6
SERPING1
SPP1
TMED10
VAT1
VWF
ALDH1A3
AOPEP
CCN2
CD44
CDKN2D
CITED2
CLTB
COL1A2
CREG1
CRYAB
CXCL14
CYP1B1
EIF2S2
ESM1
F3
FN1
GSN
GUK1
HBS1L
HPS5
HSPA2
HTATIP2
IFI16
IGFBP4
IGFBP7
IGSF3
MMP1
NDN
NME2
OPTN
PEA15
RAB13
RAB31
RAB5B
RABGGTA
RAC1
RBL2
RGL2
RHOB
RRAS
S100A11
SERPINB2
SMPD1
SPARC
TES
THBS1
TNFAIP2
TNFAIP3
TSPYL5
VIM
AKT3
ARG2
BCL2L12
BGLAP
BMPR1A
CALR
CGAS
CTC1
DNAJA3
ECRG4
FBXO5
FZR1
H2AX
HMGA1
HMGA2
ICAM1
ID2
KAT6A
KIR2DL4
KRAS
LIMS1
MAGEA2B
MAP3K3
MARCHF5
MIR10A
MIR146A
MIR17
MIR188
MIR20B
MIR21
MIR217
MIR22
MIR34A
MIR543
MIR590
MME
MNT
NPM1
NSMCE2
NUP62
OPA1
PAWR
PDCD4
PLK2
PRELP
RBL1
ROMO1
SLC30A10
SMC5
SMC6
SPI1
SRF
TBX3
TWIST1
ULK3
VASH1
WNT1
YBX1
ZKSCAN3
ZMIZ1
ZNF277
ZNF354A
ACD
AGO1
AGO3
AGO4
ANAPC1
ANAPC10
ANAPC11
ANAPC16
ANAPC2
ANAPC4
ANAPC5
ANAPC7
CABIN1
CBX2
CBX4
CBX6
CCNA1
CCNE1
CCNE2
CDC16
CDC23
CDC26
CDC27
CDK2
CDKN2C
E2F2
E2F3
EED
EHMT1
EHMT2
EP400
ERF
H1-0
H1-1
H1-3
H1-4
H1-5
H2AB1
H2AC14
H2AC18
H2AC19
H2AC4
H2AC6
H2AC7
H2AC8
H2AZ1
H2AZ2
H2BC1
H2BC10
H2BC11
H2BC12
H2BC13
H2BC14
H2BC15
H2BC17
H2BC21
H2BC3
H2BC4
H2BC5
H2BC6
H2BC7
H2BC8
H2BC9
H2BS1
H2BU1
H3-3A
H3-3B
H3-4
H3C1
H3C10
H3C11
H3C12
H3C13
H3C14
H3C15
H3C2
H3C3
H3C4
H3C6
H3C7
H3C8
H4-16
H4C1
H4C11
H4C12
H4C13
H4C14
H4C15
H4C2
H4C3
H4C4
H4C5
H4C6
H4C9
HIRA
KAT5
KDM6B
MAP2K4
MAP4K4
MAPK1
MAPK10
MAPK11
MAPK7
MAPKAPK2
MAPKAPK3
MDM4
MINK1
MIR24-1
MIR24-2
MOV10
MRE11
PHC1
PHC2
PHC3
RAD50
RBBP4
RBBP7
RING1
RNF2
RPS27A
RPS6KA1
RPS6KA2
RPS6KA3
SCMH1
SUZ12
TERF2IP
TFDP2
TINF2
TNIK
TNRC6A
TNRC6B
TNRC6C
UBA52
UBC
UBE2C
UBE2D1
UBE2E1
UBE2S
UBN1
ABCA8
ADAMTS5
ALDH3A2
APLP1
BACE1
C7
CCDC85B
CCND2
CLIP1
COX7A1
GABBR2
GBX2
GMFG
HBG1
HBG2
HSD17B2
IVNS1ABP
LCAT
MMP3
PSTPIP2
RAPGEF4
SIM2
SLC4A4
SNCA
TSPAN12
USF2
VAMP8
WFDC1
FH
GOT1
ME1
ME2
PDHA1
PDK1
PDP2
AKT1S1
AMBRA1
ATG10
ATG12
ATG13
ATG14
ATG16L1
ATG3
ATG5
ATG7
BECN1
BMP2
CCL3
CDC25B
COL10A1
COL1A1
COL3A1
FKBP8
GABARAP
GABARAPL1
GABARAPL2
IL1B
IL24
IL3
IL6R
IL6ST
INHBA
IRF1
KMT2A
LAMP1
LAMP2
MAP1LC3A
MAP1LC3C
MIR29B2
MIR29C
MIR3606
MLST8
MMP14
PIK3C3
PLAT
RB1CC1
SH3GLB1
SLC39A1
SLC39A2
SLC39A3
SLC39A4
SMAD3
SMAD4
ULK1
UVRAG
VTN
OASL
APOL1
IFI27
COL17A1
CD82
IL32
APOL3
RSPO3
HERC5
BIRC3
CD163L1
MYD88
BATF2
PMAIP1
MLKL
GCA
DUSP6
ATF3
LGALS9
GMPR
ISG20
CXCL2
TNFRSF18
ACVR1B
ANG
ANGPT1
ANGPTL4
AREG
BEX3
BMP6
CCL1
CCL13
CCL16
CCL2
CCL20
CCL24
CCL26
CCL3L1
CCL4
CCL5
CCL7
CCL8
CD55
CD9
CSF1
CSF2
CSF2RB
CST4
CTSB
CXCL10
CXCL12
CXCL16
CXCL3
CXCR2
DKK1
EDN1
EREG
FGF1
FGF2
FGF7
GDF15
GEM
HGF
ICAM3
IL10
IL13
IL15
IL18
INHA
IQGAP2
ITGA2
ITPKA
KITLG
LCP1
MMP10
MMP12
MMP13
MMP2
NAP1L4
PECAM1
PGF
PIGF
PLAUR
PTBP1
PTGER2
PTGES
RPS6KA5
SCAMP4
SELPLG
SEMA3F
SERPINB4
SERPINE2
SPX
TIMP2
TNFRSF11B
TNFRSF1A
TNFRSF1B
TUBGCP2
VEGFC
VGF

## Sheet: All gene lists 
Cell_age	Gen_Age	Casella_UP	sencan_geneset	Hernandez	BIOCARTA_LONGEVITY_PATHWAY	MAGALHAES_AGING_UP	FRIDMAN_SENESCENCE_UP	GOBP_CELL_AGING	REACTOME_CELLULAR_SENESCENCE	TANG_SENESCENCE_TP53_TARGETS_UP	WP_TCA_CYCLE_IN_SENESCENCE	WP_SENESCENCE_AND_AUTOPHAGY_IN_CANCER	GOBP_REGULATION_OF_CELL_AGING	GOBP_POSITIVE_REGULATION_OF_CELL_AGING	GOBP_REPLICATIVE_SENESCENCE	Purcell	SenMayo
AAK1	A2M	TMEM159	AL512306.2	FAM214B	AKT1	ADIPOR2	ALDH1A3	ABL1	ACD	A2M	BRAF	AKT1S1	ABL1	ARG2	ATM	OASL	ACVR1B
ABI3	ABL1	CHPF2	AL133243.3	P4HA2	CAT	ANXA3	AOPEP	AKT3	AGO1	ABCA8	FH	AMBRA1	AKT3	B2M	ATR	APOL1	ANG
ACLY	ADCY5	SLC9A7	SNRPA	CCND1	FOXO3	ANXA5	CCN2	ARG2	AGO3	ADAMTS5	GOT1	ATG10	ARG2	CDKN2A	CDKN1A	IFI27	ANGPT1
ADCK5	AGPAT2	PLOD1	AL136295.5	DYNLT3	GH1	APOD	CCND1	ARNTL	AGO4	ALDH3A2	MDH1	ATG12	ARNTL	CGAS	CDKN2A	COL17A1	ANGPTL4
AGT	AGTR1	FAM234B	ITGB1BP2	SCOC	GHR	B2M	CD44	ATM	ANAPC1	APLP1	ME1	ATG13	B2M	EEF1E1	CHEK1	CD82	AREG
AKR1B1	AIFM1	DHRS7	OR7E122P	TAF13	HRAS	C1QA	CDKN1A	ATR	ANAPC10	BACE1	ME2	ATG14	BCL2L12	HLA-G	CHEK2	IL32	AXL
AKT1	AKT1	SRPX	C14orf93	TOLLIP	IGF1	C1QB	CDKN1C	B2M	ANAPC11	C7	PDHA1	ATG16L1	BCL6	HMGA1	CTC1	APOL3	BEX3
ALOX15B	APEX1	SRPX2	TMCO6	GBE1	IGF1R	C1QC	CDKN2A	BCL2	ANAPC15	CCDC85B	PDK1	ATG3	BMPR1A	HMGA2	ERCC1	C3	BMP2
AR	APOC3	TNFSF13B	RTEL1	CHMP5	PIK3CA	C3	CDKN2B	BCL2L12	ANAPC16	CCND2	PDP2	ATG5	CDK6	KIR2DL4	MIR21	CTSS	BMP6
ARPC1B	APOE	PDLIM1	SRSF2	UFM1	PIK3CG	C4A	CDKN2D	BCL6	ANAPC2	CDKN1A	TP53	ATG7	CDKN2A	KRAS	MME	RSPO3	C3
ASF1A	APP	ELMOD1	AC115284.2	DGKA	PIK3R1	CLIC4	CITED2	BGLAP	ANAPC4	CLIP1		BCL2	CGAS	LMNA	PLA2R1	HERC5	CCL1
ASPH	APTX	CCND3	NKIRAS1	PLXNA3	SHC1	CLU	CLTB	BMPR1A	ANAPC5	COX7A1		BECN1	EEF1E1	MIR10A	ROMO1	PLAU	CCL13
ATF7IP	AR	TMEM30A	AC114490.1	DDA1	SOD1	CTSS	COL1A2	BRCA2	ANAPC7	GABBR2		BMI1	FBXO5	MIR146A	SERPINE1	BIRC3	CCL16
ATM	ARHGAP1	STAT1	PLA2G4C	TMEM87B	SOD2	DCLK1	CREG1	CALR	ASF1A	GBX2		BMP2	FOXM1	MIR188	TERT	CLDN1	CCL2
AURKA	ARNTL	RND3	AC074387.1	ZBTB7A	SOD3	DERL1	CRYAB	CDK6	ATM	GMFG		BRAF	FZR1	MIR20B	TP53	CD163L1	CCL20
AXL	ATF2	TMEM59	KANTR	RAI14		EFCAB14	CXCL14	CDKN1A	BMI1	HBG1		CCL3	HLA-G	MIR21	WNT16	MYD88	CCL24
BAG3	ATM	SARAF	ARL6IP4	TSPAN13		EFEMP1	CYP1B1	CDKN2A	CABIN1	HBG2		CD44	HMGA1	MIR217	WRN	IL1B	CCL26
BCL6	ATP5O	SLCO2B1	C2orf42	ZNHIT1		FCGR2A	EIF2S2	CDKN2B	CBX2	HSD17B2		CDC25B	HMGA2	MIR22		TNFAIP3	CCL3
BHLHE40	ATR	ARRDC4	AC068946.1	ACADVL		FCGR2B	ESM1	CGAS	CBX4	IVNS1ABP		CDKN1A	ING2	MIR34A		BATF2	CCL3L1
BLK	BAK1	PAM	BTN1A1	SLC10A3		GBP2	F3	CHEK1	CBX6	LCAT		CDKN1B	KIR2DL4	PAWR		GNG11	CCL4
BLVRA	BAX	WDR78	DDX58	POFUT2		GFAP	FILIP1L	CHEK2	CBX8	MMP3		CDKN2A	KRAS	SIRT1		PMAIP1	CCL5
BMI1	BCL2	WDR63	JMJD7	B4GALT7		GNS	FN1	CTC1	CCNA1	NRG1		CEBPB	LMNA	TP53		MLKL	CCL7
BRAF	BDNF	NCSTN	LINC02158	BCL2L2		GPNMB	GSN	DNAJA3	CCNA2	PSTPIP2		COL10A1	MAP3K3	YPEL3		GCA	CCL8
BRCA1	BLM	SLC16A14	PCIF1	NOL3		GSTA1	GUK1	ECRG4	CCNE1	RAPGEF4		COL1A1	MARCHF5			DUSP6	CD55
BRD7	BMI1	GPR155	ZNFX1	KLC1		H1-2	HBS1L	EEF1E1	CCNE2	SIM2		COL3A1	MIF			ICAM1	CD9
BTG3	BRCA1	CLDN1	SRSF7	PLK3		HBA1	HPS5	ERCC1	CDC16	SLC4A4		CREG1	MIR10A			ATF3	CSF1
CAV1	BRCA2	JCAD	STX3	SLC16A3		HCST	HSPA2	FBXO5	CDC23	SNCA		CXCL1	MIR146A			LGALS9	CSF2
CAVIN1	BSCL2	BLCAP	MAP1LC3B	ADPGK		HLA-G	HTATIP2	FOXM1	CDC26	TFAP4		CXCL14	MIR17			GMPR	CSF2RB
CBX7	BUB1B	FILIP1L	CIDECP1			IL33	IFI16	FZR1	CDC27	TSPAN12		CXCL8	MIR188			ISG20	CST4
CBX8	BUB3	TAP1	DLEU2L			JCHAIN	IFNG	H2AX	CDK2	USF2		E2F1	MIR20B			CXCL2	CTNNB1
CCND1	C1QA	TNFRSF10C	CDHR4			LAPTM5	IGFBP1	HLA-G	CDK4	VAMP8		FKBP8	MIR21			TNFRSF18	CTSB
CDK1	CACNA1A	SAMD9L	SNHG3			LGALS3	IGFBP2	HMGA1	CDK6	WFDC1		FN1	MIR217				CXCL1
CDK18	CAT	SMCO3	TRIM52-AS1			LITAF	IGFBP3	HMGA2	CDKN1A	ZMAT3		GABARAP	MIR22				CXCL10
CDK2AP1	CCNA2	POFUT2	ALG6			LYZ	IGFBP4	HRAS	CDKN1B			GABARAPL1	MIR34A				CXCL12
CDK4	CDC42	KIAA1671	H2AC20			MGST1	IGFBP5	ICAM1	CDKN2A			GABARAPL2	MIR543				CXCL16
CDK6	CDK1	LRP10	AL390719.1			MPEG1	IGFBP6	ID2	CDKN2B			GSK3B	MIR590				CXCL2
CDKN1A	CDK7	DIO2	OVGP1			MSN	IGFBP7	ING2	CDKN2C			GSN	NEK4				CXCL3
CDKN1B	CDKN1A	MAP4K3-DT	BLOC1S3			MT1F	IGSF3	KAT6A	CDKN2D			HMGA1	NEK6				CXCL8
CDKN1C	CDKN2A	LINC02154	HMGN2			NDRG1	ING1	KIR2DL4	CEBPB			HRAS	NUAK1				CXCR2
CDKN2A	CDKN2B	TM4SF1-AS1	BRAP			NPC2	IRF5	KRAS	CXCL8			IFI16	PAWR				DKK1
CDKN2AIP	CEBPA	PTCHD4	TRA2B			PCSK6	IRF7	LIMS1	E2F1			IFNB1	PLK2				EDN1
CDKN2B	CEBPB	H2AJ	ATG4A			PSMD11	ISG15	LMNA	E2F2			IFNG	PNPT1				EGF
CEBPB	CETP	PURPL	TPRG1L			PTGES3	MAP1LC3B	MAGEA2	E2F3			IGF1	PRKDC				EGFR
CENPA	CHEK2		CZIB			RASA3	MAP2K3	MAGEA2B	EED			IGF1R	PTEN				EREG
CHEK1	CISD2		AL049840.5			RNF213	MDM2	MAP2K1	EHMT1			IGFBP3	RBL1				ESM1
CKB	CLOCK		RBM10			S100A4	MMP1	MAP3K3	EHMT2			IGFBP5	RSL1D1				ETS2
CPEB1	CLU		AC022211.3			S100A6	NDN	MAPK14	EP400			IGFBP7	SIRT1				FAS
CSNK1A1	CNR1		TAC3			SERPING1	NME2	MAPKAPK5	ERF			IL1A	SLC30A10				FGF1
CSNK2A1	COQ7		TPCN2			SGK1	NRG1	MARCHF5	ETS1			IL1B	TERC				FGF2
CTNNAL1	CREB1		TAF6			SPP1	OPTN	MIF	ETS2			IL24	TERF2				FGF7
CXCL1	CREBBP		NRF1			TMED10	PEA15	MIR10A	EZH2			IL3	TERT				GDF15
CXCL8	CSNK1E		ZNF2			TXNIP	RAB13	MIR146A	FOS			IL6	TP53				GEM
CYR61	CTF1		MAMDC4			VAT1	RAB31	MIR17	FZR1			IL6R	TWIST1				GMFG
DDB2	CTGF		HAUS4			VWF	RAB5B	MIR188	H1-0			IL6ST	VASH1				HGF
DEK	CTNNB1		HMGB1				RABGGTA	MIR20B	H1-1			ING1	WNT1				HMGB1
DGCR8	DBN1		CCDC174				RAC1	MIR21	H1-2			ING2	YBX1				ICAM1
DHCR24	DDIT3		SLC23A3				RBL2	MIR217	H1-3			INHBA	YPEL3				ICAM3
DHX9	DGAT1		ZNF628				RGL2	MIR22	H1-4			INS	ZKSCAN3				IGF1
DLX2	DLL3		THAP7				RHOB	MIR34A	H1-5			IRF1	ZMPSTE24				IGFBP1
DPY30	E2F1		TMEM217				RRAS	MIR543	H2AB1			IRF5	ZNF277				IGFBP2
DUSP16	EEF1A1		AC147067.1				S100A11	MIR590	H2AC14			IRF7					IGFBP3
DUSP3	EEF1E1		SLC25A45				SERPINB2	MME	H2AC18			JUN					IGFBP4
E2F1	EEF2		ANP32B				SERPINE1	MNT	H2AC19			KMT2A					IGFBP5
EHF	EFEMP1		H4C8				SMPD1	MORC3	H2AC20			LAMP1					IGFBP6
ENDOG	EGF		AL162581.1				SMURF2	MTOR	H2AC4			LAMP2					IGFBP7
EPHA3	EGFR		UFM1				SOD1	NEK4	H2AC6			MAP1LC3A					IL10
ERRFI1	EGR1		HNRNPA1				SPARC	NEK6	H2AC7			MAP1LC3B					IL13
ETS1	EIF5A2		CATSPERG				STAT1	NOX4	H2AC8			MAP1LC3C					IL15
ETS2	ELN		SRSF4				TES	NPM1	H2AJ			MAP2K1					IL18
EWSR1	EMD		TRAPPC12				TFAP2A	NSMCE2	H2AX			MAP2K3					IL1A
EZH2	EP300		RBM14				TGFB1I1	NUAK1	H2AZ1			MAPK1					IL1B
FASTK	EPOR		GPN3				THBS1	NUP62	H2AZ2			MAPK14					IL2
FBXO31	EPS8		ZDHHC12				TNFAIP2	OPA1	H2BC1			MDM2					IL32
FOS	ERBB2		FOXD4L1				TNFAIP3	PAWR	H2BC10			MIR29B2					IL6
FOXM1	ERCC1		EEFSEC				TP53	PDCD4	H2BC11			MIR29C					IL6ST
FOXO3	ERCC2		RFPL4A				TSPYL5	PLA2R1	H2BC12			MIR3606					IL7
FXR1	ERCC3		SFPQ				VIM	PLK2	H2BC13			MLST8					INHA
G6PD	ERCC4		DHPS					PML	H2BC14			MMP14					IQGAP2
GAPDH	ERCC5		UGT2B15					PNPT1	H2BC15			MTOR					ITGA2
GATA4	ERCC6		R3HCC1L					PRELP	H2BC17			PCNA					ITPKA
GKN1	ERCC8		AL441992.2					PRKCD	H2BC21			PIK3C3					JUN
GLB1	ESR1		NRM					PRKDC	H2BC3			PLAT					KITLG
GNG11	FAS		ZNF674					PRMT6	H2BC4			PLAU					LCP1
GRK6	FEN1		NT5C					PTEN	H2BC5			PTEN					MIF
HDAC1	FGF21		THOC6					RBL1	H2BC6			RAF1					MMP1
HDAC4	FGF23		AC139530.1					ROMO1	H2BC7			RB1					MMP10
HEPACAM	FGFR1		UBE4B					RSL1D1	H2BC8			RB1CC1					MMP12
HIVEP1	FLT1		TRIM35					SERPINE1	H2BC9			RNASEL					MMP13
HJURP	FOS		CRYZL1					SIRT1	H2BS1			RSL1D1					MMP14
HK3	FOXM1		IFIT2					SLC30A10	H2BU1			SERPINB2					MMP2
HMGB1	FOXO1		WDYHV1					SMC5	H3-3A			SERPINE1					MMP3
HRAS	FOXO3		RNF103					SMC6	H3-3B			SH3GLB1					MMP9
HSPA5	FOXO4		RUNDC1					SOD1	H3-4			SLC39A1					NAP1L4
HSPB2	GCLC		SREBF1					SPI1	H3C1			SLC39A2					NRG1
ID1	GCLM		RPL7A					SRF	H3C10			SLC39A3					PAPPA
ID4	GDF11		ZBTB12					TBX2	H3C11			SLC39A4					PECAM1
IFNG	GH1		TECR					TBX3	H3C12			SMAD3					PGF
IGFBP1	GHR		AC022413.2					TERC	H3C13			SMAD4					PIGF
IGFBP3	GHRH		ADGRF2					TERF2	H3C14			SPARC					PLAT
IGFBP5	GHRHR		ZNF490					TERT	H3C15			SQSTM1					PLAU
IGFBP6	GPX1		PPP2R5B					TP53	H3C2			SRC					PLAUR
IL1A	GPX4		CCDC34					TP63	H3C3			TGFB1					PTBP1
ING1	GRB2		RNF111					TWIST1	H3C4			THBS1					PTGER2
ING2	GRN		HNRNPM					ULK3	H3C6			TNFSF15					PTGES
IRF3	GSK3A		CDKN1A					VASH1	H3C7			TP53					RPS6KA5
IRF5	GSK3B		WDR34					WNT1	H3C8			ULK1					SCAMP4
IRF7	GSR		ALOX15P1					WNT16	H4-16			UVRAG					SELPLG
ITGB4	GSS		C18orf32					WRN	H4C1			VTN					SEMA3F
ITPK1	GSTA4		RASSF3					YBX1	H4C11								SERPINB4
ITPKB	GSTP1		PITPNA-AS1					YPEL3	H4C12								SERPINE1
ITSN2	GTF2H2		ZFYVE1					ZKSCAN3	H4C13								SERPINE2
KCNJ12	H2AFX		NDUFC1					ZMIZ1	H4C14								SPP1
KDM4A	HBP1		THAP6					ZMPSTE24	H4C15								SPX
KDM5B	HDAC1		UQCRC1					ZNF277	H4C2								TIMP2
KIAA1524	HDAC2		ISG15					ZNF354A	H4C3								TNF
KL	HDAC3		NEURL3						H4C4								TNFRSF10C
KSR2	HELLS		IFIT1						H4C5								TNFRSF11B
LATS1	HESX1		STK38L						H4C6								TNFRSF1A
LEO1	HIC1		AFF4						H4C8								TNFRSF1B
LGALS3	HIF1A		HNRNPR						H4C9								TUBGCP2
LIMA1	HMGB1		SOS1						HIRA								VEGFA
LIMK1	HMGB2		ZNF564						HMGA1								VEGFC
MAD2L1	HOXB7		FOS						HMGA2								VGF
MAGEA2	HOXC4		MAGEB6						ID1								WNT16
MAGOH	HRAS		MRPS31P4						IFNB1								WNT2
MAGOHB	HSF1		SPIDR						IGFBP7
MAP2K1	HSP90AA1		HAUS5						IL1A
MAP2K2	HSPA1A		AL592148.3						IL6
MAP2K3	HSPA1B		ANAPC15						JUN
MAP2K6	HSPA8		ITGAM						KAT5
MAP2K7	HSPA9		TRNAU1AP						KDM6B
MAP3K6	HSPD1		NDUFA12						LMNB1
MAP3K7	HTRA2		GFY						MAP2K3
MAP4K1	HTT		MRPS24						MAP2K4
MAPK12	IFNB1		AC073283.2						MAP2K6
MAPK14	IGF1		IPCEF1						MAP2K7
MAPKAPK5	IGF1R		CCDC59						MAP3K5
2021-03-05	IGF2								MAP4K4
MAST1	IGFBP2								MAPK1
MATK	IGFBP3								MAPK10
MCL1	IKBKB								MAPK11
MCRS1	IL2								MAPK14
MDH1	IL2RG								MAPK3
MECP2	IL6								MAPK7
MMP9	IL7								MAPK8
MOB3A	IL7R								MAPK9
MORC3	INS								MAPKAPK2
MORF4	INSR								MAPKAPK3
MVK	IRS1								MAPKAPK5
MXD4	IRS2								MDM2
MYC	JAK2								MDM4
MYLK	JUN								MINK1
NADK	JUND								MIR24-1
NANOG	KCNA3								MIR24-2
NDRG1	KL								MOV10
NEK1	LEP								MRE11
NEK4	LEPR								NBN
NEK6	LMNA								NFKB1
NFE2L2	LMNB1								PHC1
NINJ1	LRP2								PHC2
NOTCH3	MAP3K5								PHC3
NOX4	MAPK14								POT1
NR2E1	MAPK3								RAD50
NTN4	MAPK8								RB1
NUAK1	MAPK9								RBBP4
OTX2	MAPT								RBBP7
P3H1	MAX								RELA
PAK4	MDM2								RING1
PATZ1	MED1								RNF2
PBRM1	MIF								RPS27A
PCGF2	MLH1								RPS6KA1
PDCD10	MSRA								RPS6KA2
PDIK1L	MT-CO1								RPS6KA3
PDPK1	MT1E								SCMH1
PDZD2	MTOR								SP1
PEBP1	MXD1								STAT3
PEX19	MXI1								SUZ12
PIAS4	MYC								TERF1
PIK3C2A	NBN								TERF2
PIK3R5	NCOR1								TERF2IP
PIM1	NCOR2								TFDP1
PKM	NFE2L1								TFDP2
PLA2R1	NFE2L2								TINF2
PML	NFKB1								TNIK
PMVK	NFKB2								TNRC6A
PNPT1	NFKBIA								TNRC6B
POT1	NGF								TNRC6C
POU5F1	NGFR								TP53
PPM1B	NOG								TXN
PPM1D	NR3C1								UBA52
PRKCD	NRG1								UBB
PRKCH	NUDT1								UBC
PRMT6	PAPPA								UBE2C
PROX1	PARP1								UBE2D1
PRPF19	PCK1								UBE2E1
PSMB5	PCMT1								UBE2S
PSMD14	PCNA								UBN1
PTTG1	PDGFB								VENTX
RAD21	PDGFRA
RAF1	PDGFRB
RB1	PDPK1
RBP2	PEX5
RBX1	PIK3CA
RNASEL	PIK3CB
RPS6KA6	PIK3R1
RSL1D1	PIN1
RUNX1	PLAU
RUVBL2	PLCG2
SELENOH	PMCH
SENP1	PML
SENP2	POLA1
SENP7	POLB
SERPINE1	POLD1
SFN	POLG
SGK1	PON1
SIK1	POU1F1
SIN3B	PPARA
SIRT1	PPARG
SIRT6	PPARGC1A
SIX1	PPM1D
SLC13A3	PPP1CA
SLC16A7	PRDX1
SMARCA4	PRKCA
SMARCB1	PRKCD
SMG1	PRKDC
SMURF2	PROP1
SNAI1	PSEN1
SOCS1	PTEN
SOD1	PTGS2
SORBS2	PTK2
SOX2	PTK2B
SOX5	PTPN1
SP1	PTPN11
SPIN1	PYCR1
SPOP	RAD51
SRC	RAD52
SREBF1	RAE1
SRSF1	RB1
STAT5B	RECQL4
STK32C	RELA
STK40	RET
SUPT5H	RGN
SYK	RICTOR
TACC3	RPA1
TBX2	S100B
TERC	SDHC
TERF2	SERPINE1
TERT	SHC1
TFAP4	SIN3A
TFDP1	SIRT1
TGFB1I1	SIRT3
TLR3	SIRT6
TMSB4X	SIRT7
TNFSF13	SLC13A1
TNFSF15	SNCG
TOP1	SOCS2
TP53	SOD1
TP63	SOD2
TPR	SP1
TRIM28	SPRTN
TRPM8	SQSTM1
TXN	SST
TXNIP	SSTR3
TYK2	STAT3
UBTD1	STAT5A
USP1	STAT5B
VEGFA	STK11
VENTX	STUB1
WNT16	SUMO1
WNT2	SUN1
WRN	TAF1
WT1	TBP
WWP1	TCF3
XAF1	TERC
YAP1	TERF1
YPEL3	TERF2
ZFP36	TERT
ZMAT3	TFAP2A
ZNF148	TFDP1
	TGFB1
	TNF
	TOP1
	TOP2A
	TOP2B
	TOP3B
	TP53
	TP53BP1
	TP63
	TP73
	TPP2
	TRAP1
	TRPV1
	TXN
	UBB
	UBE2I
	UCHL1
	UCP1
	UCP2
	UCP3
	VCP
	VEGFA
	WRN
	XPA
	XRCC5
	XRCC6
	YWHAZ
	ZMPSTE24
