# Supplementary material for: Identification and validation of senescence-related genes in polycystic ovary syndrome
Source: J Ovarian Res. 2024 Jan 6;17:7. doi: 10.1186/s13048-023-01338-4 (PMC10770899; doi:10.1186/s13048-023-01338-4)
Supplement: Supplementary file 4 — Additional file 4: Table S4. The edges information for TF-miRNA-mRNA regulatory network. [file 13048_2023_1338_MOESM4_ESM.xlsx]

## Sheet: CXCR2
source	target
USF2	CXCR2
CEBPA	CXCR2
NFKB1	CXCR2
RELA	CXCR2
hsa-mir-22-3p	CXCR2
hsa-mir-335-5p	CXCR2
hsa-mir-588	CXCR2
hsa-mir-411-5p	CXCR2
hsa-mir-29a-5p	CXCR2
hsa-mir-1306-3p	CXCR2
hsa-mir-548s	CXCR2
hsa-mir-3187-3p	CXCR2
hsa-mir-3194-5p	CXCR2
hsa-mir-4293	CXCR2
hsa-mir-4435	CXCR2
hsa-mir-4701-5p	CXCR2
hsa-mir-5096	CXCR2
hsa-mir-4524b-3p	CXCR2
hsa-mir-6802-3p	CXCR2
hsa-mir-6823-5p	CXCR2
hsa-mir-6832-5p	CXCR2
hsa-mir-6849-3p	CXCR2
hsa-mir-126-3p	CXCR2
hsa-mir-194-5p	CXCR2
hsa-mir-26a-5p	CXCR2
hsa-mir-27a-3p	CXCR2
hsa-mir-429	CXCR2

## Sheet: LMNB1
source	target
TFAP2C	LMNB1
RORA	LMNB1
ALX1	LMNB1
YY1	LMNB1
USF1	LMNB1
TFAP2A	LMNB1
MYC	LMNB1
MAX	LMNB1
E2F1	LMNB1
hsa-mir-23a-3p	LMNB1
hsa-mir-26b-5p	LMNB1
hsa-mir-30a-3p	LMNB1
hsa-mir-101-3p	LMNB1
hsa-mir-192-5p	LMNB1
hsa-mir-215-5p	LMNB1
hsa-mir-218-5p	LMNB1
hsa-mir-200b-3p	LMNB1
hsa-mir-1-3p	LMNB1
hsa-mir-23b-3p	LMNB1
hsa-mir-124-3p	LMNB1
hsa-mir-128-3p	LMNB1
hsa-mir-154-5p	LMNB1
hsa-mir-320a	LMNB1
hsa-mir-200c-3p	LMNB1
hsa-mir-30e-3p	LMNB1
hsa-mir-373-3p	LMNB1
hsa-mir-429	LMNB1
hsa-mir-484	LMNB1
hsa-mir-193b-3p	LMNB1
hsa-mir-524-5p	LMNB1
hsa-mir-520d-5p	LMNB1
hsa-mir-506-3p	LMNB1
hsa-mir-600	LMNB1
hsa-mir-548c-3p	LMNB1
hsa-mir-636	LMNB1
hsa-mir-15a-3p	LMNB1
hsa-mir-30d-3p	LMNB1
hsa-mir-10b-3p	LMNB1
hsa-mir-130a-5p	LMNB1
hsa-mir-138-2-3p	LMNB1
hsa-mir-513a-3p	LMNB1
hsa-mir-889-3p	LMNB1
hsa-mir-1224-5p	LMNB1
hsa-mir-1301-3p	LMNB1
hsa-mir-1304-5p	LMNB1
hsa-mir-1248	LMNB1
hsa-mir-449c-3p	LMNB1
hsa-mir-3123	LMNB1
hsa-mir-3163	LMNB1
hsa-mir-3065-3p	LMNB1
hsa-mir-4297	LMNB1
hsa-mir-4282	LMNB1
hsa-mir-3613-3p	LMNB1
hsa-mir-23c	LMNB1
hsa-mir-3667-5p	LMNB1
hsa-mir-3915	LMNB1
hsa-mir-3919	LMNB1
hsa-mir-3928-3p	LMNB1
hsa-mir-4529-5p	LMNB1
hsa-mir-4660	LMNB1
hsa-mir-4689	LMNB1
hsa-mir-4709-3p	LMNB1
hsa-mir-4724-5p	LMNB1
hsa-mir-4753-5p	LMNB1
hsa-mir-4766-5p	LMNB1
hsa-mir-4778-5p	LMNB1
hsa-mir-5047	LMNB1
hsa-mir-4482-3p	LMNB1
hsa-mir-5008-3p	LMNB1
hsa-mir-5011-5p	LMNB1
hsa-mir-5186	LMNB1
hsa-mir-5581-5p	LMNB1
hsa-mir-513c-3p	LMNB1
hsa-mir-3606-3p	LMNB1
hsa-mir-6083	LMNB1
hsa-mir-190a-3p	LMNB1
hsa-mir-651-3p	LMNB1
hsa-mir-6737-3p	LMNB1
hsa-mir-6858-5p	LMNB1
hsa-mir-6889-3p	LMNB1
hsa-mir-7156-3p	LMNB1
hsa-mir-7157-3p	LMNB1
hsa-mir-7159-3p	LMNB1
hsa-mir-6516-5p	LMNB1
hsa-mir-8055	LMNB1
hsa-mir-8086	LMNB1
hsa-let-7a-5p	LMNB1
hsa-let-7b-5p	LMNB1
hsa-let-7c-5p	LMNB1
hsa-let-7e-5p	LMNB1
hsa-let-7f-5p	LMNB1
hsa-let-7g-5p	LMNB1
hsa-let-7i-5p	LMNB1
hsa-mir-125a-5p	LMNB1
hsa-mir-125b-5p	LMNB1
hsa-mir-1296-5p	LMNB1
hsa-mir-148a-3p	LMNB1
hsa-mir-148b-3p	LMNB1
hsa-mir-148b-5p	LMNB1
hsa-mir-152-3p	LMNB1
hsa-mir-15a-5p	LMNB1
hsa-mir-15b-5p	LMNB1
hsa-mir-16-2-3p	LMNB1
hsa-mir-16-5p	LMNB1
hsa-mir-17-3p	LMNB1
hsa-mir-17-5p	LMNB1
hsa-mir-182-3p	LMNB1
hsa-mir-182-5p	LMNB1
hsa-mir-18a-5p	LMNB1
hsa-mir-199a-5p	LMNB1
hsa-mir-199b-5p	LMNB1
hsa-mir-20a-3p	LMNB1
hsa-mir-20b-5p	LMNB1
hsa-mir-2110	LMNB1
hsa-mir-212-3p	LMNB1
hsa-mir-21-5p	LMNB1
hsa-mir-221-5p	LMNB1
hsa-mir-22-5p	LMNB1
hsa-mir-27a-3p	LMNB1
hsa-mir-27b-3p	LMNB1
hsa-mir-27b-5p	LMNB1
hsa-mir-29a-3p	LMNB1
hsa-mir-29b-3p	LMNB1
hsa-mir-29c-3p	LMNB1
hsa-mir-302a-5p	LMNB1
hsa-mir-3127-3p	LMNB1
hsa-mir-342-3p	LMNB1
hsa-mir-375	LMNB1
hsa-mir-424-5p	LMNB1
hsa-mir-4738-3p	LMNB1
hsa-mir-548d-3p	LMNB1
hsa-mir-548h-3p	LMNB1
hsa-mir-548z	LMNB1
hsa-mir-629-3p	LMNB1
hsa-mir-7-5p	LMNB1
hsa-mir-760	LMNB1
hsa-mir-935	LMNB1
hsa-mir-93-5p	LMNB1
hsa-mir-936	LMNB1
hsa-mir-98-5p	LMNB1
hsa-mir-103a-3p	LMNB1
hsa-mir-107	LMNB1
hsa-mir-10b-5p	LMNB1
hsa-mir-129-2-3p	LMNB1
hsa-mir-130a-3p	LMNB1
hsa-mir-138-5p	LMNB1
hsa-mir-145-5p	LMNB1
hsa-mir-147a	LMNB1
hsa-mir-155-5p	LMNB1
hsa-mir-194-5p	LMNB1
hsa-mir-195-5p	LMNB1
hsa-mir-203a-3p	LMNB1
hsa-mir-210-3p	LMNB1
hsa-mir-30a-5p	LMNB1
hsa-mir-30d-5p	LMNB1
hsa-mir-34a-5p	LMNB1
hsa-mir-196a-5p	LMNB1
hsa-mir-378a-3p	LMNB1
hsa-mir-378b	LMNB1
hsa-mir-378c	LMNB1
hsa-mir-181a-5p	LMNB1
hsa-mir-132-3p	LMNB1
hsa-mir-122-5p	LMNB1
hsa-mir-9-5p	LMNB1
hsa-mir-124	LMNB1
hsa-mir-373	LMNB1
